# Supplementary material for: Highly active, durable and recyclable ordered mesoporous magnetic organometallic catalysts for promoting organic reactions in water
Source: Royal Society of Chemistry journal article supplement (doi:10.1039/c3ta13446f), 2013-10-22
Supplement: c3ta13446f.pdf [file c3ta13446f.pdf]

## ***Supporting Information***

### **Highly Active, Durable and Recyclable Ordered Mesoporous Magnetic Organometal Catalysts Promoted Organic Reactions in Water**

Fang Zhang,<sup>a, b</sup> Mingzhen Chen,<sup>a</sup> Xiaotao Wu,<sup>a</sup> Wei Wang<sup>b,\*</sup> and Hexing Li<sup>a,\*</sup>

<sup>a</sup> *The Education Ministry Key Lab of Resource Chemistry and Shanghai Key Lab of  
Rare Earth Functional Materials, Shanghai Normal University, China*

<sup>b</sup> *Department of Chemistry and Chemical Biology, University of New Mexico,  
Albuquerque, NM 87131-000, USA*

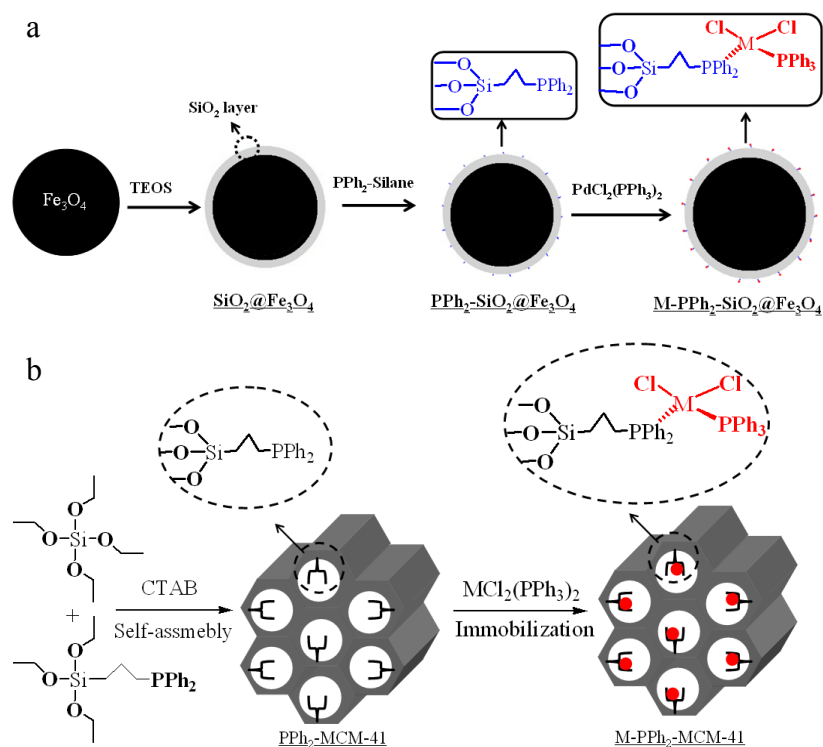

Scheme S1 Schematic illustration of the synthetic procedure of (a) M-PPh<sub>2</sub>-SiO<sub>2</sub>@Fe<sub>3</sub>O<sub>4</sub> and (b) M-PPh<sub>2</sub>-MCM-41 catalysts (M = Pd<sup>2+</sup> or Rh<sup>+</sup>).

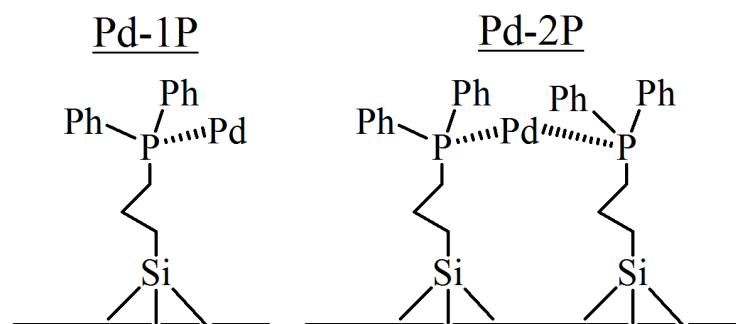

Scheme S2 Dependence of the coordination model on the P/M ratio of different catalysts.

Table S1 Elemental analysis and structural parameters of different catalysts

| Sample                                                                                    | Pd Loading<br>(mmol/g) | P content<br>( mmol/g) | Particle Size<br>(nm) | S <sub>BET</sub><br>(m <sup>2</sup> /g) | D <sub>P</sub><br>(nm) | V <sub>P</sub><br>(cm <sup>3</sup> /g) |
|-------------------------------------------------------------------------------------------|------------------------|------------------------|-----------------------|-----------------------------------------|------------------------|----------------------------------------|
| Pd-PPh <sub>2</sub> -SiO <sub>2</sub> @Fe <sub>3</sub> O <sub>4</sub>                     | 0.0109                 | 0.110                  | 440                   | 35                                      | 1.0                    | 0.030                                  |
| PPh <sub>2</sub> -MCM-41@SiO <sub>2</sub> @Fe <sub>3</sub> O <sub>4</sub>                 | /                      | 0.380                  | /                     | 268                                     | 2.9                    | 0.43                                   |
| Pd-PPh <sub>2</sub> -MCM-41@SiO <sub>2</sub> @Fe <sub>3</sub> O <sub>4</sub>              | 0.0723                 | 0.503                  | 520                   | 240                                     | 2.8                    | 0.37                                   |
| Pd-PPh <sub>2</sub> -MCM-41                                                               | 0.161                  | 0.516                  | 10~1500               | 551                                     | 2.5                    | 0.60                                   |
| Pd-PPh <sub>2</sub> -MCM-41@SiO <sub>2</sub> @Fe <sub>3</sub> O <sub>4</sub> <sup>a</sup> | 0.0683                 | 0.290                  | 530                   | 170                                     | 2.8                    | 0.21                                   |
| Pd-PPh <sub>2</sub> -SiO <sub>2</sub> @Fe <sub>3</sub> O <sub>4</sub> <sup>a</sup>        | 0.00896                | 0.195                  | 445                   | 31                                      | 1.0                    | 0.030                                  |
| Pd-PPh <sub>2</sub> -MCM-41 <sup>a</sup>                                                  | 0.150                  | 0.560                  | 10~1500               | 510                                     | 2.5                    | 0.57                                   |
| Rh-PPh <sub>2</sub> -MCM-41@SiO <sub>2</sub> @Fe <sub>3</sub> O <sub>4</sub>              | 0.0765                 | 0.496                  | 530                   | 170                                     | 2.8                    | 0.21                                   |
| Rh-PPh <sub>2</sub> -SiO <sub>2</sub> @Fe <sub>3</sub> O <sub>4</sub>                     | 0.0120                 | 0.108                  | 445                   | 31                                      | 1.0                    | 0.030                                  |
| Rh-PPh <sub>2</sub> -MCM-41                                                               | 0.167                  | 0.510                  | 10~1500               | 510                                     | 2.5                    | 0.57                                   |

<sup>a</sup> The catalysts after being reused for 8 times.

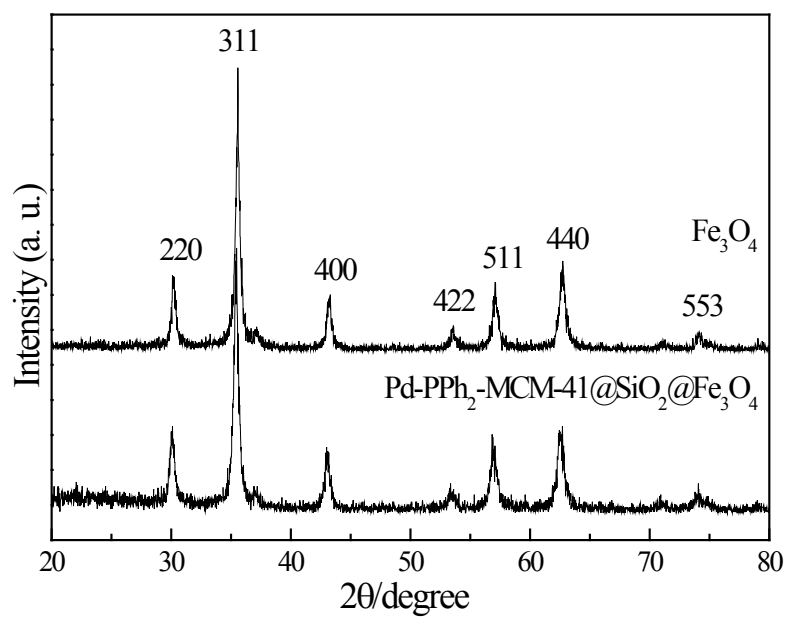

Figure S1 Wide-angle XRD patterns of  $\text{Fe}_3\text{O}_4$  and  $\text{Pd-PPh}_2\text{-MCM-41@SiO}_2\text{@Fe}_3\text{O}_4$ .

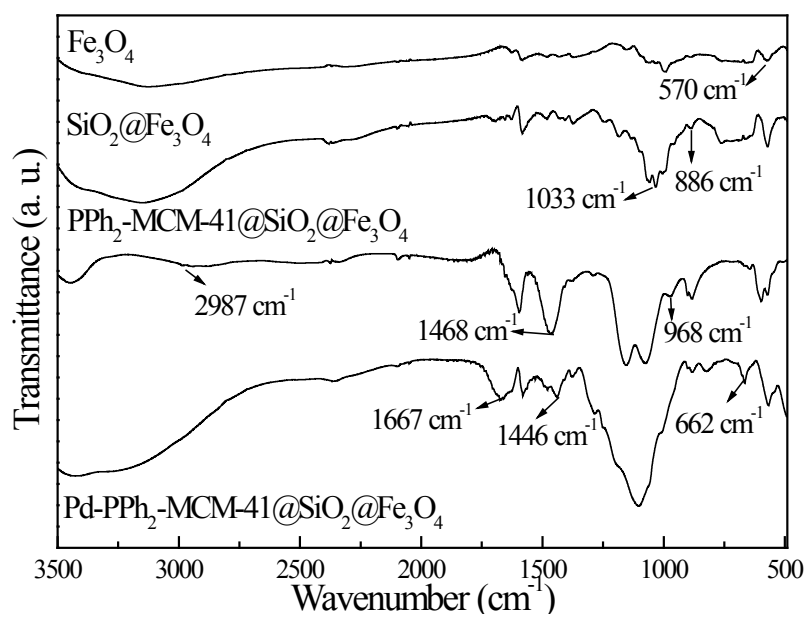

Figure S2 FT-IR spectra of Fe<sub>3</sub>O<sub>4</sub>, SiO<sub>2</sub>@Fe<sub>3</sub>O<sub>4</sub>, PPh<sub>2</sub>-MCM-41@SiO<sub>2</sub>@Fe<sub>3</sub>O<sub>4</sub>, and Pd-PPh<sub>2</sub>-MCM-41@SiO<sub>2</sub>@Fe<sub>3</sub>O<sub>4</sub> samples.

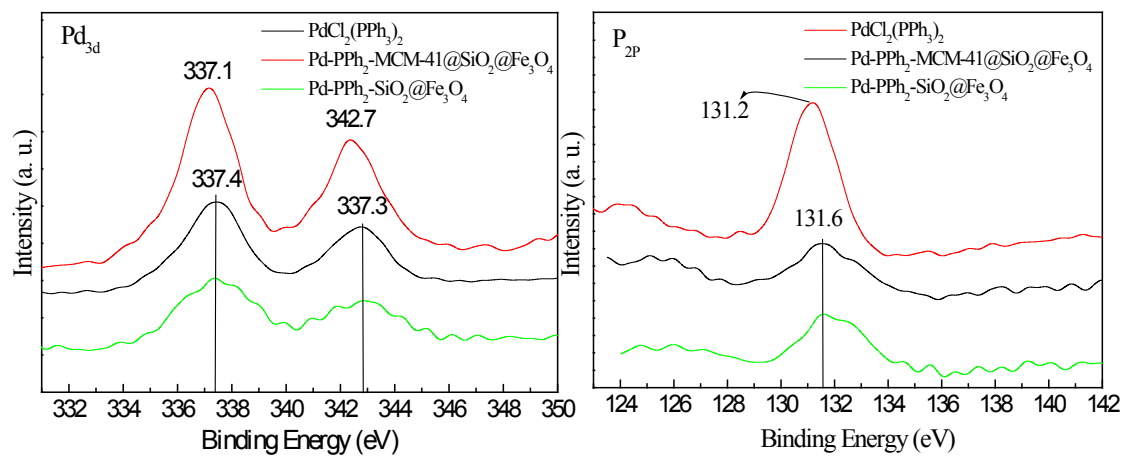

Figure S3 XPS spectra of Pd-PPh<sub>2</sub>-MCM-41@SiO<sub>2</sub>@Fe<sub>3</sub>O<sub>4</sub>, Pd-PPh<sub>2</sub>-SiO<sub>2</sub>@Fe<sub>3</sub>O<sub>4</sub>, and PdCl<sub>2</sub>(PPh<sub>3</sub>)<sub>2</sub>.

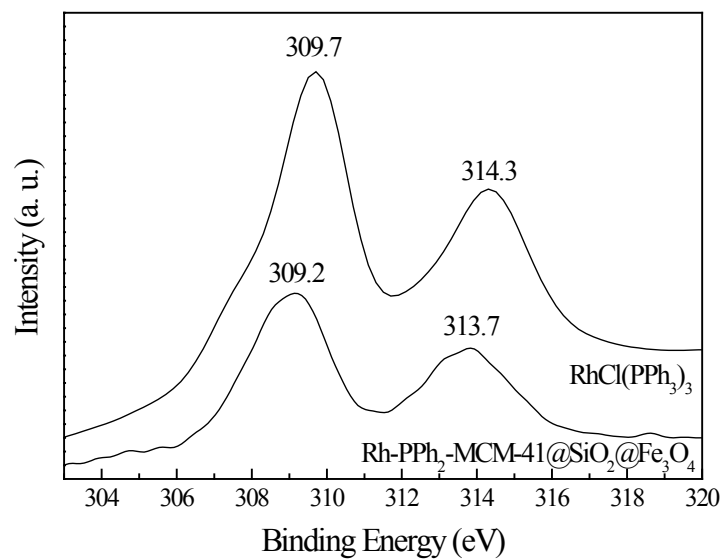

Figure S4 XPS spectra of RhCl(PPh<sub>3</sub>)<sub>3</sub> and Rh-PPh<sub>2</sub>-MCM-41@SiO<sub>2</sub>@Fe<sub>3</sub>O<sub>4</sub> catalysts.

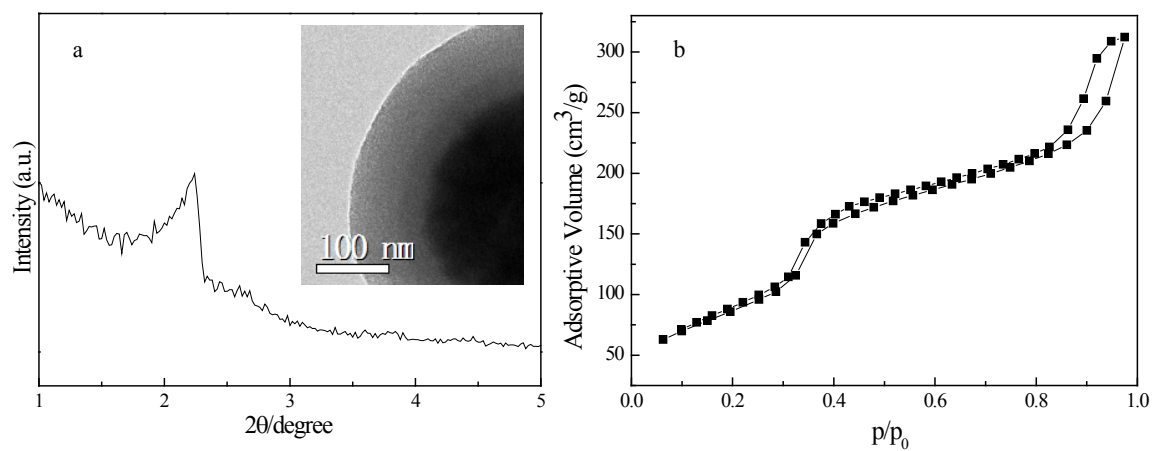

Figure S5 (a) Low-angle XRD pattern and (b) N<sub>2</sub> sorption isotherm of the Rh-PPh<sub>2</sub>-MCM-41@SiO<sub>2</sub>@Fe<sub>3</sub>O<sub>4</sub>. The attached is the HRTEM image.



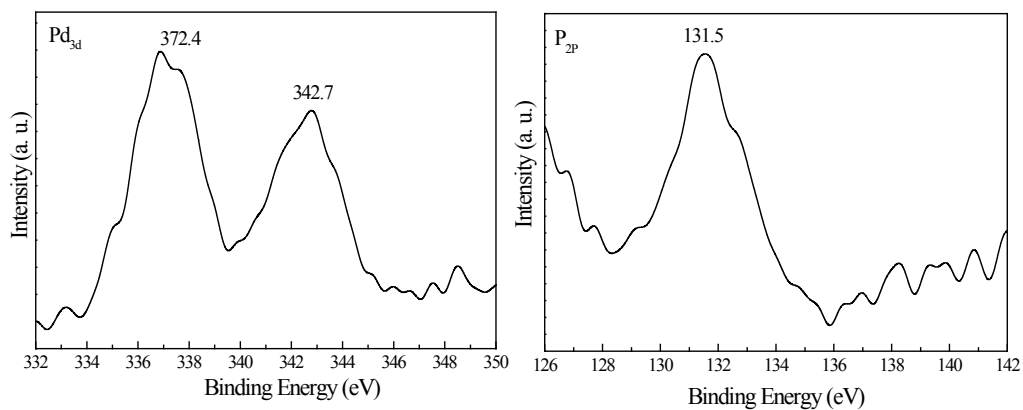

Figure S6 XPS spectra of the Pd-PPh<sub>2</sub>-MCM-41@SiO<sub>2</sub>@Fe<sub>3</sub>O<sub>4</sub> catalyst after being reused repetitively for 8 times.

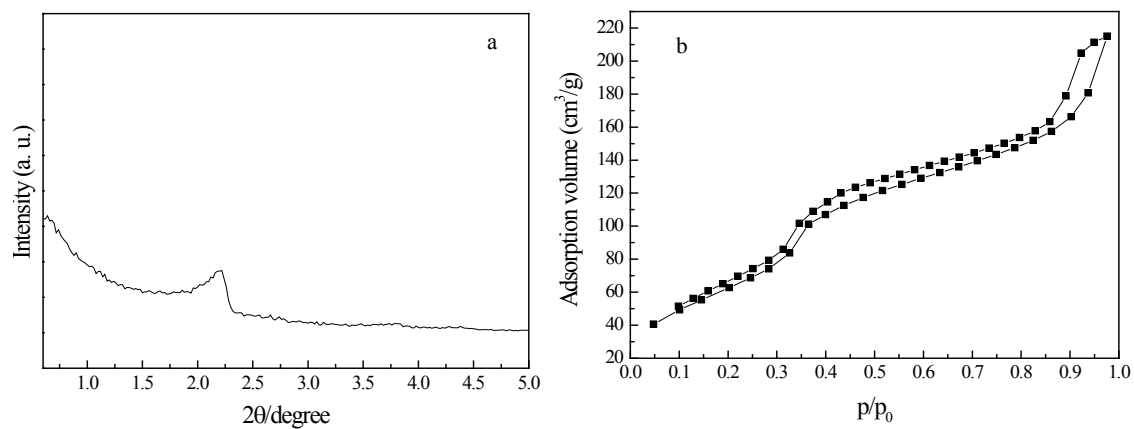

Figure S7 Low-angle XRD pattern (a) and  $N_2$  adsorption-desorption curve (b) of the Pd-PPh<sub>2</sub>-MCM-41@SiO<sub>2</sub>@Fe<sub>3</sub>O<sub>4</sub> catalyst after being reused repetitively for 8 times.
